# Supplementary material for: Effect of solvent in the hydrogenation of acetophenone catalyzed by Pd/S-DVB
Source: Royal Society of Chemistry journal article supplement (doi:10.1039/d1nj00219h), 2021-01-01
Supplement: d1nj00219h1.pdf [file d1nj00219h1.pdf]

## Supporting information

Effect of solvent in the hydrogenation of acetophenone catalyzed by Pd/S-DVB.

Tomasz Bereta<sup>a</sup>, Ewa Mieczynska<sup>a</sup>, Sylwia Ronka<sup>b</sup>, Włodzimierz Tylus, Anna  
M. Trzeciak<sup>\*a</sup>

Project: POL 2

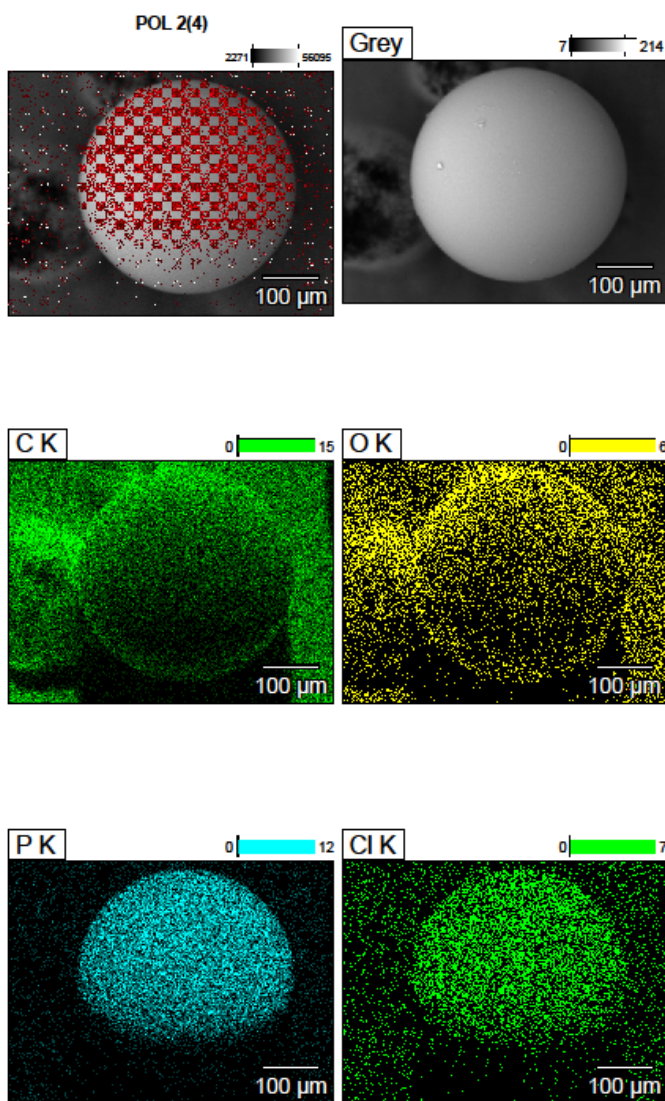

Data Type: Counts Mag: 210 Acc. Voltage: 30.0 kV

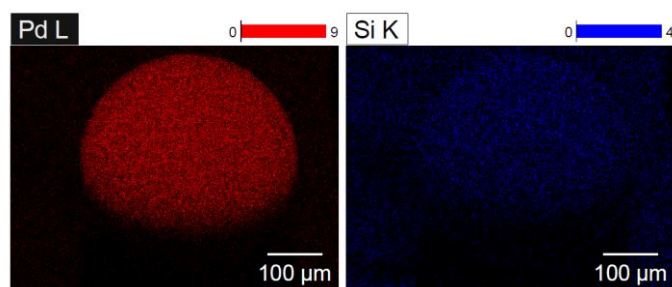

Fig. S1 Elemental mapping (SEM) for Pd/S-DVB catalyst.

| Reaction time  | 0     | 15    | 30    | 45   | 60   | 75   | 90   | 105  | 120  | 135  | 150  | 165  | 180  | 195  | 210  | 225  | 240  |
|----------------|-------|-------|-------|------|------|------|------|------|------|------|------|------|------|------|------|------|------|
| Pressure [bar] | 11.30 | 10.90 | 10.40 | 9.90 | 9.80 | 9.70 | 9.60 | 9.60 | 9.60 | 9.50 | 9.50 | 9.50 | 9.50 | 9.50 | 9.50 | 9.50 | 9.50 |

Tab. S1. Pressure changes in time for hydrogenation of APh in MeOH

| Reaction time  | 0     | 15    | 30    | 45   | 60   | 75   | 90   | 105  | 120  | 135  | 150  | 165  | 180  | 195  | 210  | 225  | 240  |
|----------------|-------|-------|-------|------|------|------|------|------|------|------|------|------|------|------|------|------|------|
| Pressure [bar] | 11.10 | 10.70 | 10.20 | 9.90 | 9.20 | 9.00 | 8.90 | 8.80 | 8.75 | 8.70 | 8.70 | 8.70 | 8.60 | 8.60 | 8.60 | 8.50 | 8.50 |

Tab. S2. Pressure changes in time for hydrogenation of APh in BuOH

| R. time  | 0     | 15    | 30    | 45    | 60    | 75    | 90    | 105   | 120   | $x_i$ H <sub>2</sub> O |
|----------|-------|-------|-------|-------|-------|-------|-------|-------|-------|------------------------|
| P. [bar] | 11.30 | 10.60 | 9.90  | 9.50  | 9.20  | 9.00  | 8.90  | 8.70  | 8.70  | <b>0.00</b>            |
| P. [bar] | 11.40 | 11.30 | 11.00 | 10.70 | 10.60 | 10.40 | 10.30 | 10.20 | 10.10 | <b>0.28</b>            |
| P. [bar] | 11.90 | 11.60 | 11.60 | 11.50 | 11.40 | 11.20 | 11.10 | 11.00 | 10.90 | <b>0.46</b>            |
| P. [bar] | 12.80 | 12.70 | 12.60 | 12.60 | 12.50 | 12.50 | 12.40 | 12.40 | 12.30 | <b>0.81</b>            |
| P. [bar] | 11.16 | 11.05 | 10.95 | 10.85 | 10.80 | 10.68 | 10.60 | 10.30 | 10.27 | <b>1.00</b>            |

| R. time  | 135   | 150   | 165   | 180   | 195   | 210   | 225   | 240   | $x_i$ H <sub>2</sub> O |
|----------|-------|-------|-------|-------|-------|-------|-------|-------|------------------------|
| P. [bar] | 8.60  | 8.60  | 8.50  | 8.50  | 8.50  | 8.50  | 8.50  | 8.40  | <b>0.00</b>            |
| P. [bar] | 10.00 | 9.90  | 9.80  | 9.80  | 9.70  | 9.70  | 9.70  | 9.70  | <b>0.28</b>            |
| P. [bar] | 10.80 | 10.70 | 10.60 | 10.50 | 10.40 | 10.30 | 10.20 | 10.20 | <b>0.46</b>            |
| P. [bar] | 12.30 | 12.20 | 12.20 | 12.10 | 12.10 | 12.10 | 12.10 | 12.10 | <b>0.81</b>            |
| P. [bar] | 10.17 | 10.05 | 9.95  | 9.85  | 9.76  | 9.71  | 9.67  | 9.54  | <b>1.00</b>            |

Tab. S3. Pressure changes in time for hydrogenation of APh in *i*-PrOH

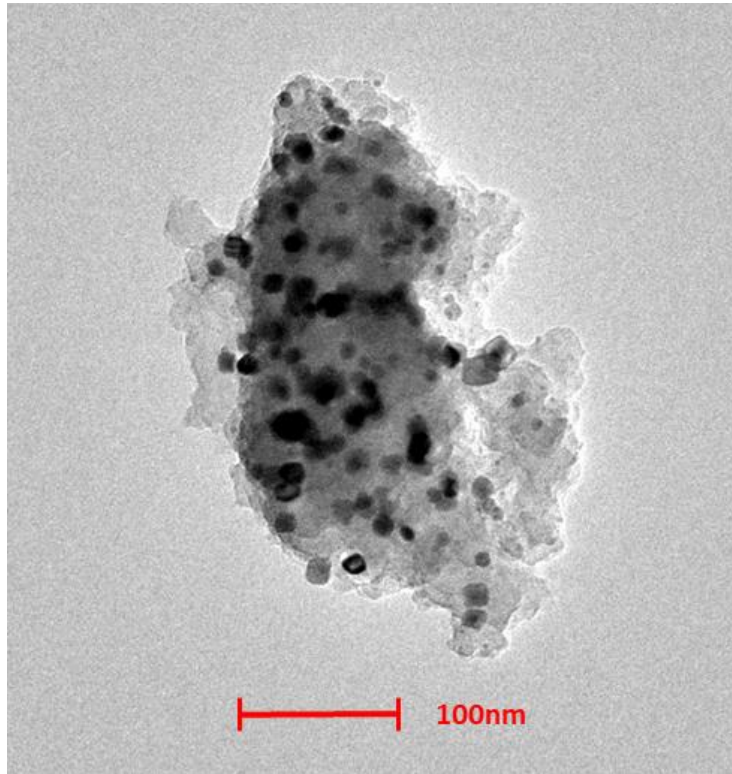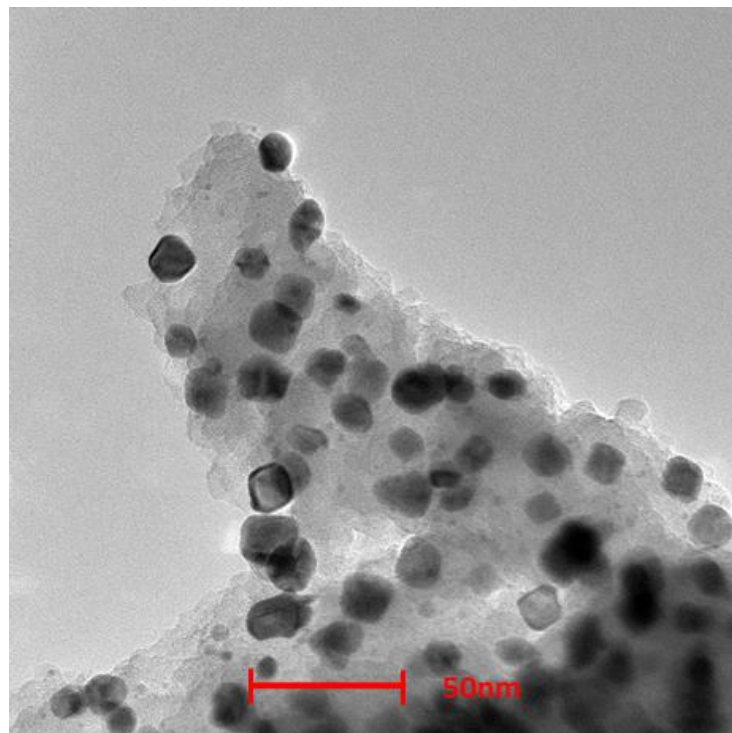

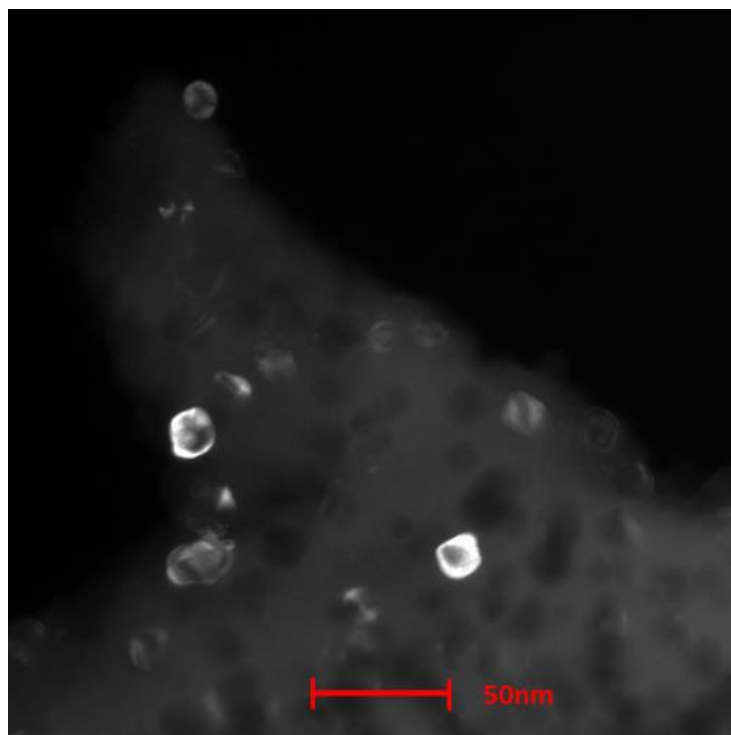

Fig. S2 TEM micrographs of Pd/S-DVB after catalytic reaction

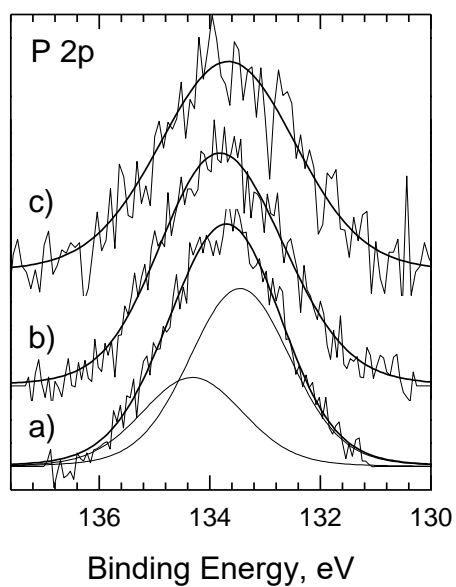

Fig. S3 XPS P 2p core level spectra for sample before reaction in 'as received' form a), for sample before reaction after soft cleaning 'in situ' b) for sample after reaction c)

## GC-MS data

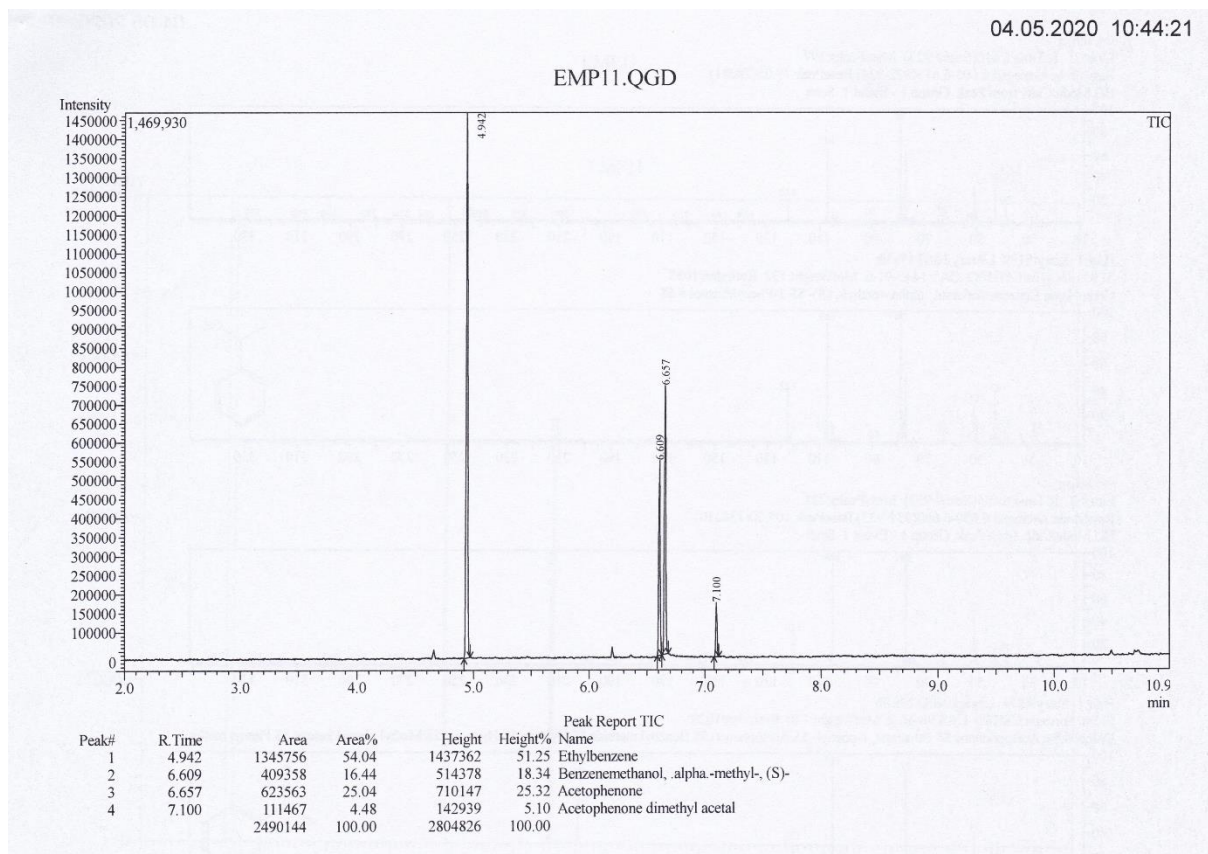

Fig. S4 GC-MS after APh hydrogenation (10 bar, 80°C, 4h)

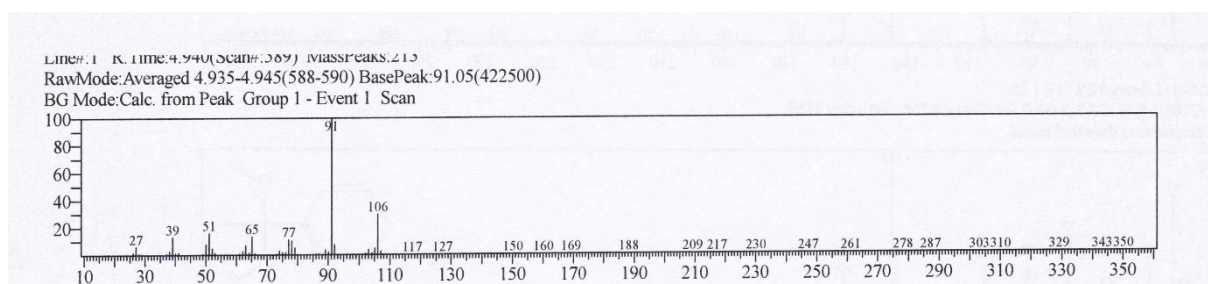

Fig. S5 MS of ethylbenzene

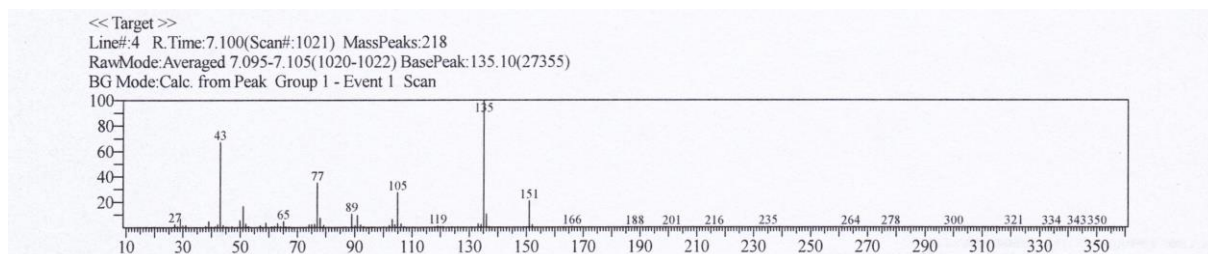

Fig. S6 MS of ketal

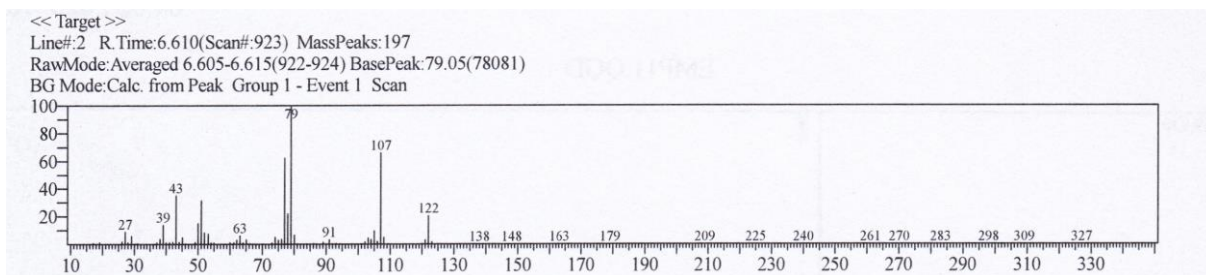

Fig. S7 MS of 1-phenylethanol

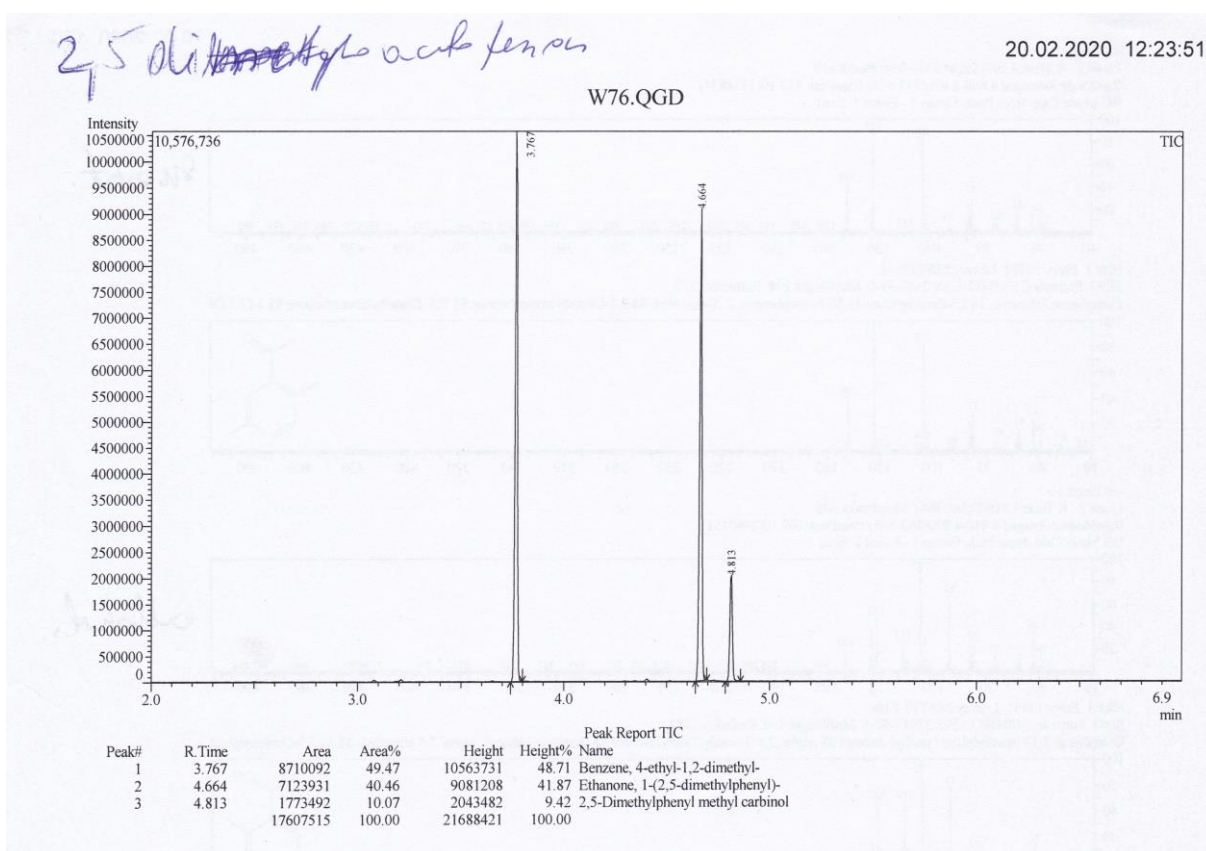

Fig. S8 GC-MS after 2,5-dimethylacetophenone hydrogenation (10 bar, 80°C, 4h, 3ml MeOH)

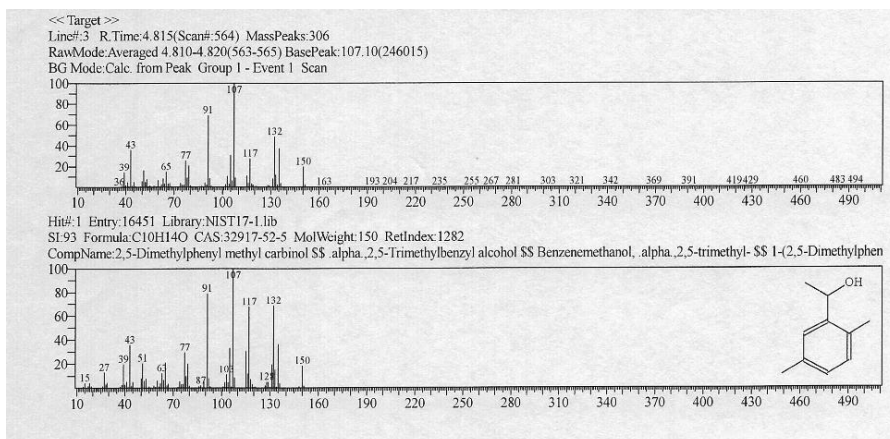

Fig. S9. MS of 1-(2,5-dimethylphenyl)ethan-1-ol

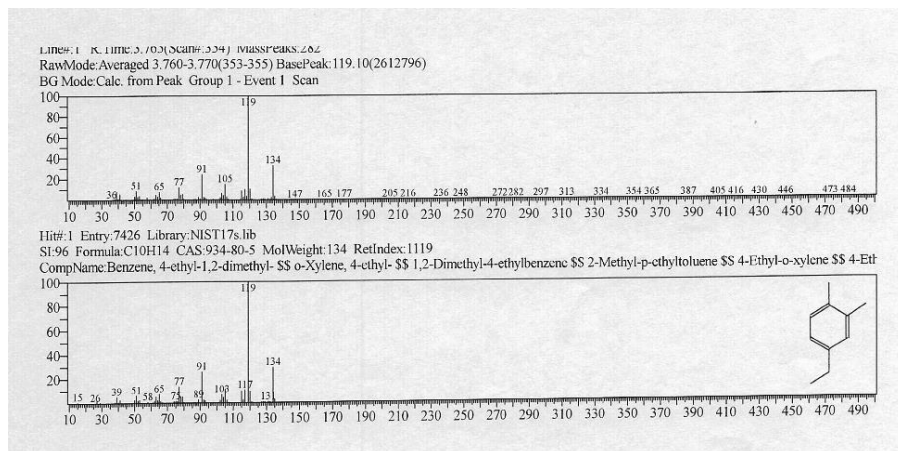

Fig. S10. MS of 1-ethyl-2,5-dimethylbenzene

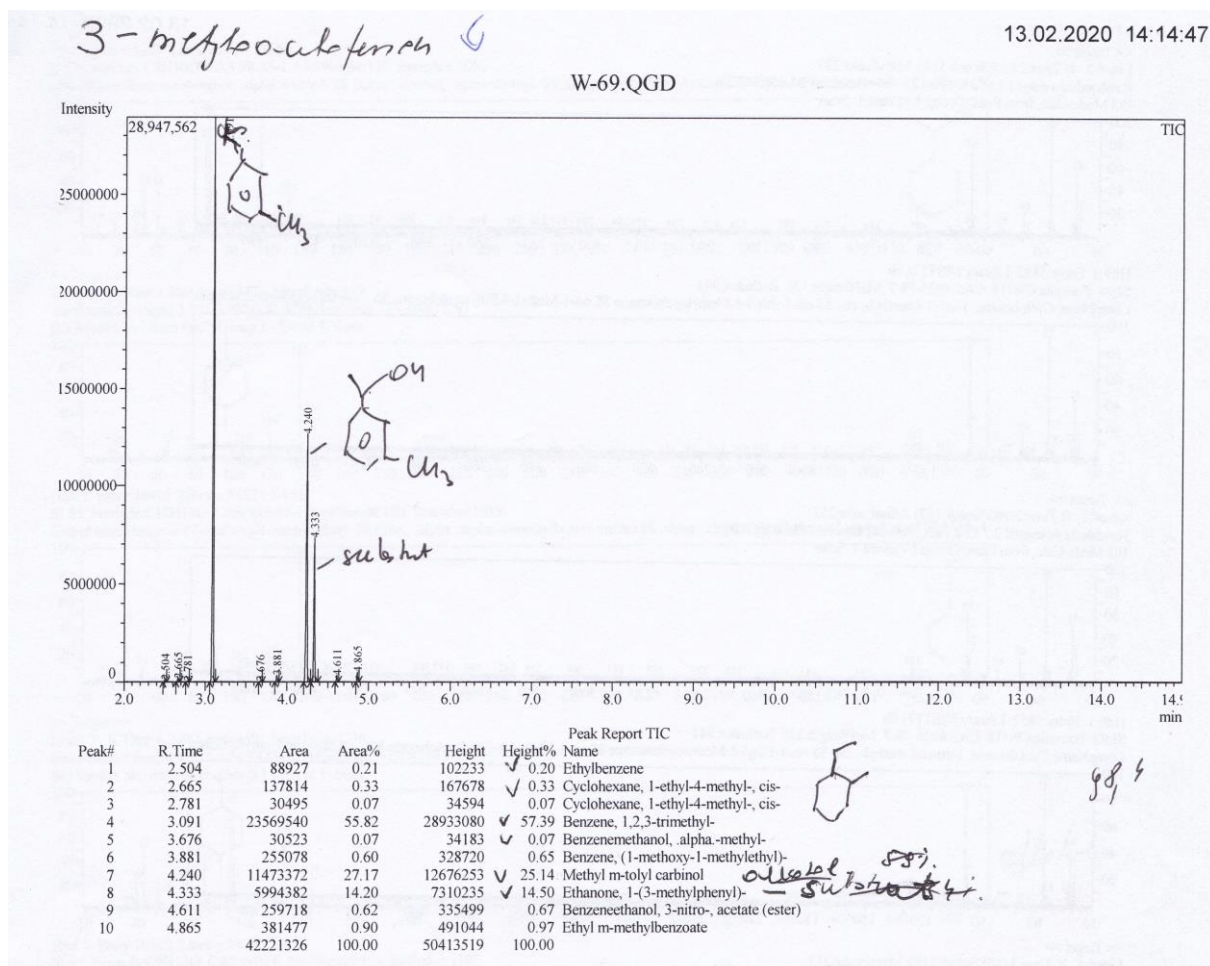

Fig. S11 GC-MS after 3-methylacetophenone hydrogenation (10 bar, 80°C, 4h, 3ml MeOH)

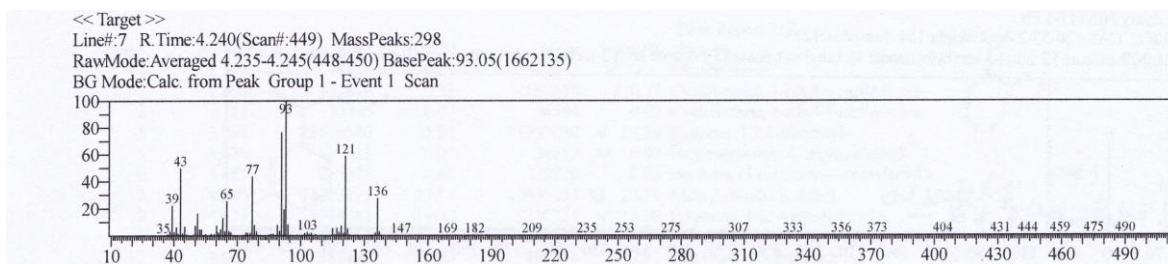

Fig. S12 MS of 1-(3-tolyl)ethan-1-ol

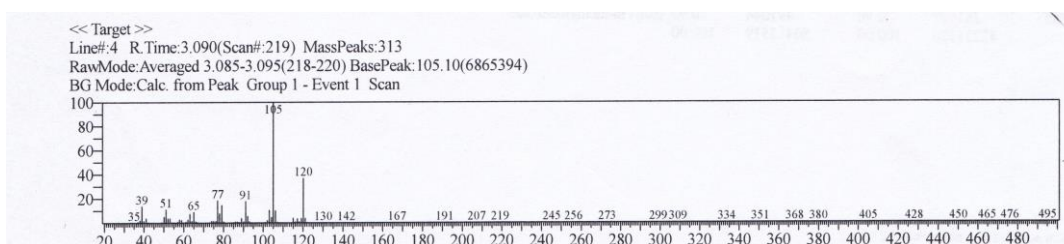

Fig. S13 MS of 1-ethyl-3-methylbenzene

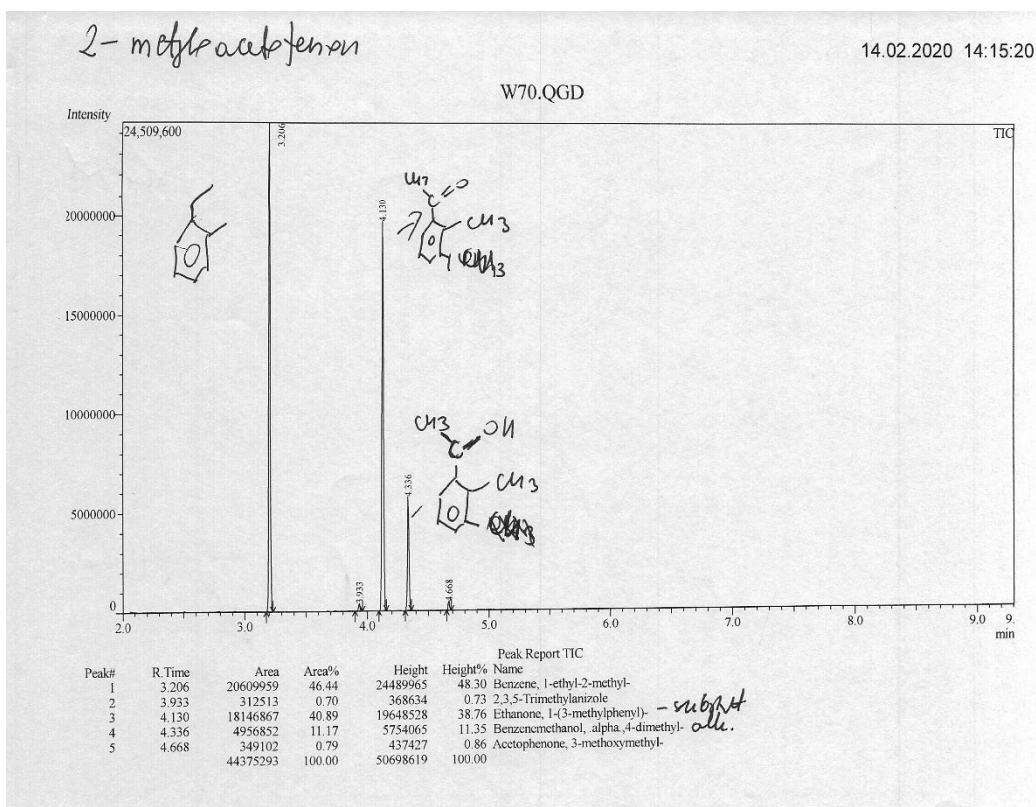

Fig. S14 GC-MS after 2-methylacetophenone hydrogenation (10 bar, 80°C, 4h)



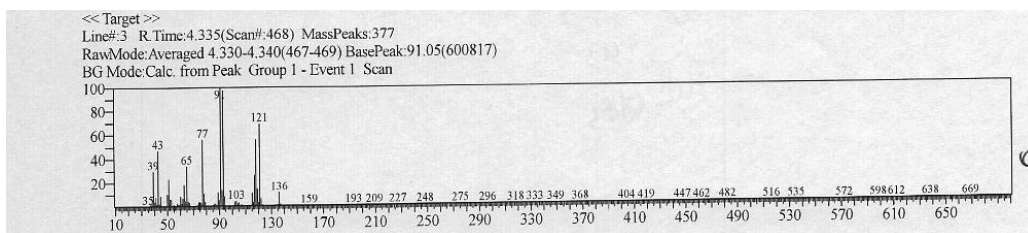

Fig. S15. MS of 1-(2-tolyl)ethan-1-ol

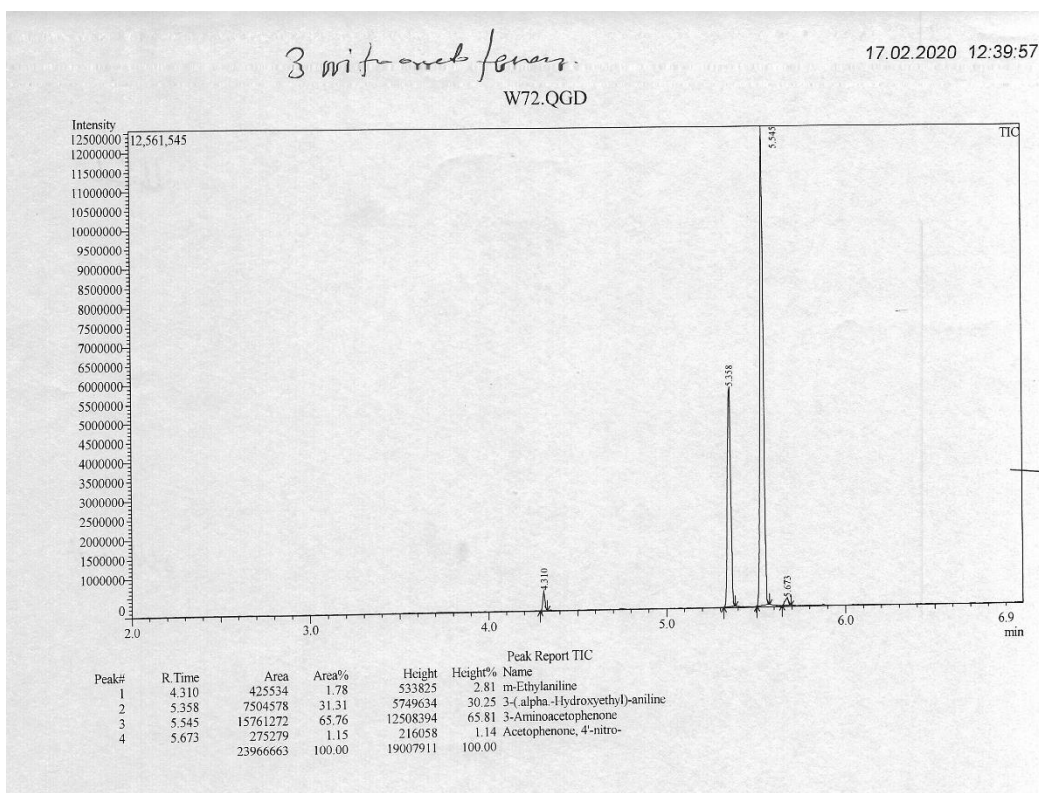

Fig. S16. GC-MS 3-aminoacetophenone hydrogenation (10 bar, 80°C, 4h)

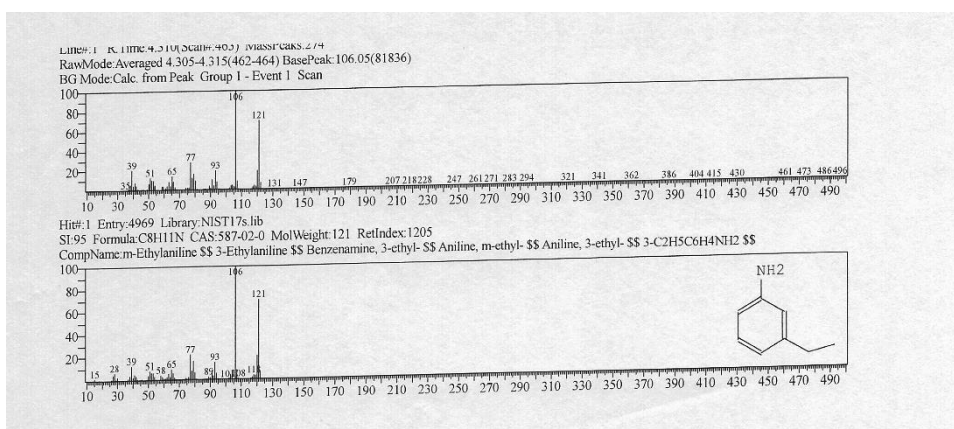

Fig. S17. MS of 3-ethylaniline

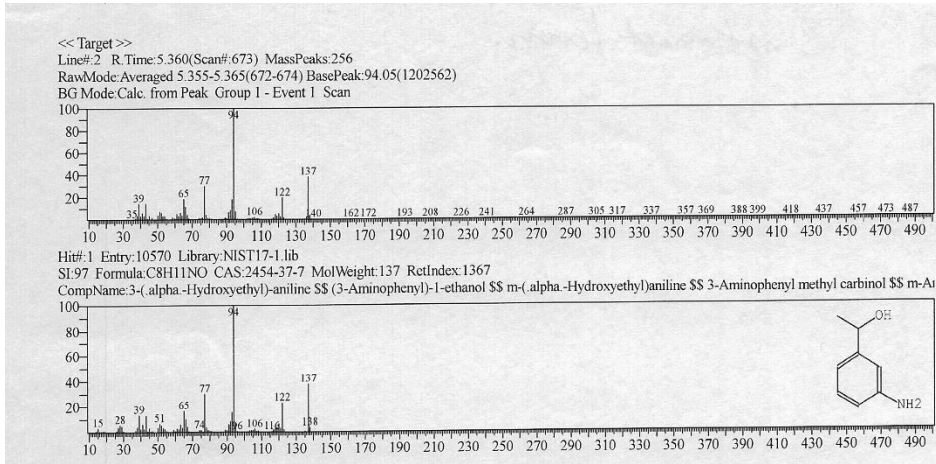

Fig. S18. MS of 1-(3-aminophenyl)ethan-1-ol
